# Supplementary material for: Sustained viremia suppression by SHIVSF162P3CN-recalled effector-memory CD8+ T cells after PD1-based vaccination
Source: PLoS Pathog. 2021 Jun 14;17(6):e1009647. doi: 10.1371/journal.ppat.1009647 (PMC8202916; doi:10.1371/journal.ppat.1009647)
Supplement: S1 Data — Tables containing raw data of all main figures. (XLSX) [file ppat.1009647.s012.xlsx]

## Sheet: Fig.1
Fig. 1B
Empty vector	pGag	pRhPD1-Gag	pRhPD1-p27
40	2700	8100	8100
40	900	2700	2700
40	900	2700	8100
Fig. 1C
	Empty vector			pGag			pRhPD1-Gag			pRhPD1-p27
pp1	0	2.5	7.5	21	8	11.5	17.5	10	10	35	45	30
pp2	15.5	15	30	63	15	7.5	145	287.5	310	1512.5	1100	670
pp3	12.5	10	20	130	42	68	670	1370	1845	3040	2470	2822.5
Fig. 1E
Empty vector	pGag	pRhPD1-Gag	pRhPD1-p27
0.024	0.713	1.04	3.21
0.029	0.661	1.1	2.97
0.024	0.832	1.44	3.18
Fig. 1F
Empty vector	pRhPD1-Gag	pRhPD1-p27
34	13	7
32	8	6
32	13	6
Fig. 1G
Empty vector	pGag	pRhPD1-Gag	pRhPD1-p27
100	900	2386	10240
100	900	640	2560
100	900	2240	2560
Fig. 1H
	Empty vector			pGag			pRhPD1-Gag			pRhPD1-p27
pp1	15	10	20	125	15	70	70	185	80	165	135	270
pp2	5	0	10	25	75	55	60	195	65	175	160	235
pp3	10	5	15	475	635	350	655	560	465	2465	785	1655
Fig. 1I
Empty vector	pGag	pRhPD1-Gag	pRhPD1-p27
0	0.27	0.29	0.46
0	0.14	0.29	0.64
0	0.24	0.26	0.8

## Sheet: Fig.2B
Week post challenge	Plasma viral load (log10 copies/mL)					Week post challenge	Plasma viral load (log10 copies/mL)
	A01	A02	A03	A04			B01	B02	B03
0	2	2	2	2		0	2	2	2
0.29	2	2	2	2		0.285714	2	2	2
0.71	2	2	2	6.49		0.714286	2.11126	2	2
1.14	6.57	5.22	5.25	5.57		1.14286	3.59819	3.67168	2.77291
1.57	8.21	7.68	7.65	7.92		1.57143	4.57714	5.28999	3.70535
2.14	7.65	6.83	6.8	6.99		2.14286	4.8803	4.5288	3.84468
3.14	3.12	4.35	3.71	3.03		3.14286	3.95182	4.63849	2
4.14	3.25	4.21	2.72	3.38		4.14286	2.69304	3.64253	2
6.14	2	2	2	2		5.42857	2.07078	2.15691	2
7.71	2.67	2.6	3.46	2		6.28571	2	2.27131	2
12.86	2	2.7	2	2		7.14286	2	2.68999	2
17.14	2	2	2	2		8.14286	2	2	2
						10.1429	2.34704	2.22173	2.46595
						12.1429	2.05411	2.38849	2
						14.1429	2.7992	2.76213	2.21415
						16.1429	2	2	2
						17.8571	2	2	2
						20	2	2	2
Week post challenge	Plasma viral load (log10 copies/mL)
	C01	C02	C03	C04	C05	C06	C07	C08	C09
0	2	2	2	2	2	2	2	2	2
0.142857	2	2	2
0.285714	2	2	2	2	2	2.00518	2.23553	2	2
0.571429	2	2	2
0.714286				2	2	2	2	2	2
1	2	2	2
1.14286				4.68449	4.89444	4.04527	3.54133	3.82659	3.62676
1.42857	6.63418	7.29336	7.71971
1.57143				6.52773	7.15311	6.60837	6.00305	6.46398	6.09557
2	6.13237	6.74238	7.0423
2.14286				6.80114	6.40997	6.6621	7.65112	6.48674	6.39958
3.14286	5.54594	5.72088	5.95916	5.51027	4.33959		3.9886	6.85194	5.64959
4.14286	4.36169	5.64381	5.7619	5.53379			5.93148	5.09462	3.09461
5.14286
5.4285									2.51737
6.14286				3.97405				5.81857
6.28571	4.81657	5.15217	6.2944						3.39018
7.14286				5.17293					2.90475
8.14286	4.12143	6.12203	5.22013	3.77001				5.13974	2.60602
10.1429	3.75381	5.18333	5.33193					6.37501	2.99054
12.1429	3.49066	5.86083	5.32754					5.76212	3.46609
14.1429									2.93697
16.1429									2.6862
17.86									2.99125
18.7143	5.10474		5.14045
20	4.33006		4.46914						2.53675

## Sheet: Fig.2C
Plasma viral load (log10 copies/mL)
A:pRhPD1-p27	B:pRhPD1-p27	C:Unvaccinated
8.21401	4.8803	6.63418
7.67809	5.28999	7.29336
7.65358	3.84468	7.71971
7.92123		6.80114
		7.15311
		6.6621
		7.65112
		6.85194
		6.39958

## Sheet: Fig.2D
Geo mean Plasma viral load (log10 copies/mL)
A+B: pRhPD1-p27	C: Unvaccinated
2.1685	4.26954
2.3249	5.57959
2.36605	5.29727
2	4.30565
2.13322	5.77386
2.25935	2.94542
2.07555

## Sheet: Fig.2E
Sample	SIV DNA proviral load (log10 copies/10^6 PBMCs)
	1.5 w.p.i	6 w.p.i	12-13 w.p.i
A01	4.87506	4.61066	3.89818
A02	4.65801	4.91222	3.5682
A03	5.26007	4.4133	3.50379
A04	4.97313	4.06819	2.95904
B01	3.38561	3.42975	3.5955
B02	4.18752	3.33445	3.02119
B03	3.22011	3.42813	3.52763
C01	5.07918	4.78176	4.38561
C02	5.85431	4.55751	4.65031
C03	5.32634	4.79239	4.75282
C04	4.75967	3.85065	/
C05	4.56229	/	/
C06	4.72263	/	/
C07	4.49554	/	/
C08	4.8488	4.69197	4.16435
C09	4.22789	3.69636	3.40654

## Sheet: Fig.2F
Week post challenge	Sample (Group A)					Week post challenge	Sample (Group B)
	A01	A02	A03	A04			B01	B02	B03
0	1.86	0.78	1.19	0.85		0	0.766038	0.600098	1.25242
1.14	2.72	1.02	1.05	1.05		1.14286	0.702511	0.864111	1.63485
2.14	0.43	0.42	0.65	0.41		2.14286	0.367229	0.464307	0.961554
4.14	1.03	0.21	0.37	0.55		3.14286	0.3743	0.427868	1.02375
7.71429	1.67	0.76	0.8	0.96		4.14286	0.340665	0.422805	1.19813
12.857	1.18	0.66	0.75	0.8		5.42857	0.45243	0.457627	1.129
17.14	1.97	0.94	0.84	1.02		6.28571	0.468728	0.502283	1.11261
						8.14286	0.451565	0.465698	1.22124
						10.1429	0.466172	0.416654	1.36102
						12.1429	0.487739	0.473663	1.61806
						16.1429	0.837922	0.636658	1.20784
						17.1429	0.817867	0.60989	1.1701
						20	0.494239	0.427124	1.48909
Week post challenge	Sample (Group C)
	C01	C02	C03	C04	C05	C06	C07	C08	C09
0	0.85	1.14	0.94	1.71545	1.93	1.88	2.43975	2.82	1.66373
1	0.87	1.4	1.14
1.14				0.913587	1.78	1.78	2.08941	2.45	2.20623
2	0.24	0.44	0.47
2.14				0.616129	0.69	0.67	1.91747	1.92	0.897478
3.14	0.24	0.37	0.41	0.3497	1.14		0.513106	0.73	0.644705
4.14	0.29	0.69	0.38	0.569095			2.09938	0.85	0.498771
5.43									0.498887
6.14				0.638522				1.64
6.29									0.5162
8.14	0.56	0.56	0.49	0.959184				0.71	1.17352
10.14									1.50702
12.1429	0.66	0.66	0.77					0.86	0.731122
16.14									0.878866
17.14									1.77816
18.7143	0.65		0.26
20									0.880243

## Sheet: Fig.2G
Weeks post challenge	A01	A02	A03	A04		Weeks post challenge	B01	B02	B03
0	100	100	100	100		0	100	100	100
0.285714	87.8645	92.6073	94.3525	91.2972		0.285714	102.641	102.494	99.7468
0.714286	97.3659	90.938	101.266	98.9327		0.428571	100.792	100.907	99.7468
1.14286	96.0489	95.31	101.558	98.9327		0.714286	102.289	107.37	102.447
1.57143	92.1919	87.3609	96.7868	94.335		1.14286	99.7359	106.803	99.2405
2.14286	92.1919	87.9968	95.2288	93.8424		1.57143	99.6479	107.37	99.7468
3.14286	97.2719	93.0843	99.5131	99.7537		2.14286	107.835	107.596	99.4262
4.14286	98.1185	92.7663	97.0789	102.381		3.14286	105.282	119.048	103.882
6.14286	102.634	105.882	103.408	103.448		4.14286	100.088	109.864	100.422
7.85714	100.376	101.192	105.161	101.806		5.42857	103.609	109.751	102.785
12.8571	94.92	105.803	116.456	107.964		6.28571	106.338	105.329	103.376
17.1429	97.1778	108.665	110.419	110.837		7.14286	111.796	97.6191	105.823
						8.14286	102.905	100.454	101.941
						9.14286	107.922	93.424	103.966
						10.1429	109.683	99.093	103.629
						11.1429	112.676	103.288	109.114
						12.1429	110.828	98.8662	105.823
						14.1429	115.317	101.361	109.536
						16.1429	109.859	107.596	102.194
						17.1429	109.859	109.751	102.954
						17.8571	107.658	110.658	104.726
						20	108.539	114.059	102.616
Weeks post challenge	C01	C02	C03	C04	C05	C06	C07	C08	C09
0	100	100	100	100	100	100	100	100	100
0.285714	98.9443	103.947	98.9809	101.863	92.5894	102.292	102.115	102.054	115.672
0.428571	110.749	120.658	106.369						112.983
0.714286	107.966	112.763	107.898	101.397	91.3688	100	102.115	99.5676	116.257
1.14286				100.349	91.3688	100.208	104.33	98.3784	116.491
1.57143	107.582	114.868	98.9809	99.8836	90.9329	100	104.33	94.5946	114.269
2.14	104.703	101.053	91.5923	104.307	89.8867	93.6458	103.827	92.3243	115.439
3.14	103.071	108.684	97.1975	102.677	79.3374		93.7563	90.3784	113.918
4.14	95.0288	98.2895	92.2293	106.519			81.6717	89.8378	111.345
5.14				110.594				87.1351
5.42857									111.696
6.14				102.445				84.973
6.28571	96.6411	98.5526	92.9936						109.942
7.14286				90.3376				86.0541	112.281
8.14286	97.3129	99.4737	97.4522	77.7648				84.5405	111.111
9.14286									113.684
10.1429	91.7466	109.21	103.057					86.7027	112.047
11.1429									116.842
12.1429	102.783	100.132	88.1529					78.2703	118.129
14.1429									123.743
16.1429									123.743
17.1429									120.819
17.8571									122.456
18.7143	94.2418		86.7516
20	91.7466		84.5859						125.848

## Sheet: Fig.2H
Weeks post challenge	A+B (pRhPD1-p27)	C (Unvaccinated)
0	100	100
2.85714		88.8889
3.71429		77.7778
5		66.6667
8.57143		55.5556
13.7143		44.4444
17.1429	100
18.8571		33.3333
19		33.3333
20	100	33.3333

## Sheet: Fig.3A
Week post 1st immunisation	A01	A02	A03	A04		Week post 1st immunisation	B01	B02	B03
8	990	262	2378	1164		0	0	0	5
14	1012.5	1007.5	3452.5	820		2	150	0	35
16	3508.8	1780	1951.5	737.5		6	0	460	110
25	166.5	30	151.5	234.8		8	1630	485	1120
26	2520.8	1396.9	2505.8	1661.7		12	1080	990	1510
						14	635	940	1085
						18	2945	3490	1045
						20	6140	6880	8370

## Sheet: Fig.3B
pRhPD1-p27 (Group A)	pRhPD1-p27 (Group B)	MVTT + Ad
2520.81	6140	3225
1396.93	6880	3320
2505.82	8370	895
1661.67		3440
		1632.5
		1362.5
		2155
		1227.5

[truncated: 10 more sheets: Fig.3D, Fig.3E, Fig.3F, Fig.3G, H, Fig.4A, Fig.4E, Fig.4F, Fig.5D, Fig.5E, Fig.5F]
